# Supplementary material
Source: PubMed Central journal article supplement (PMC2586267)
Supplement: M806527200_1.pdf [file M806527200_1.pdf]

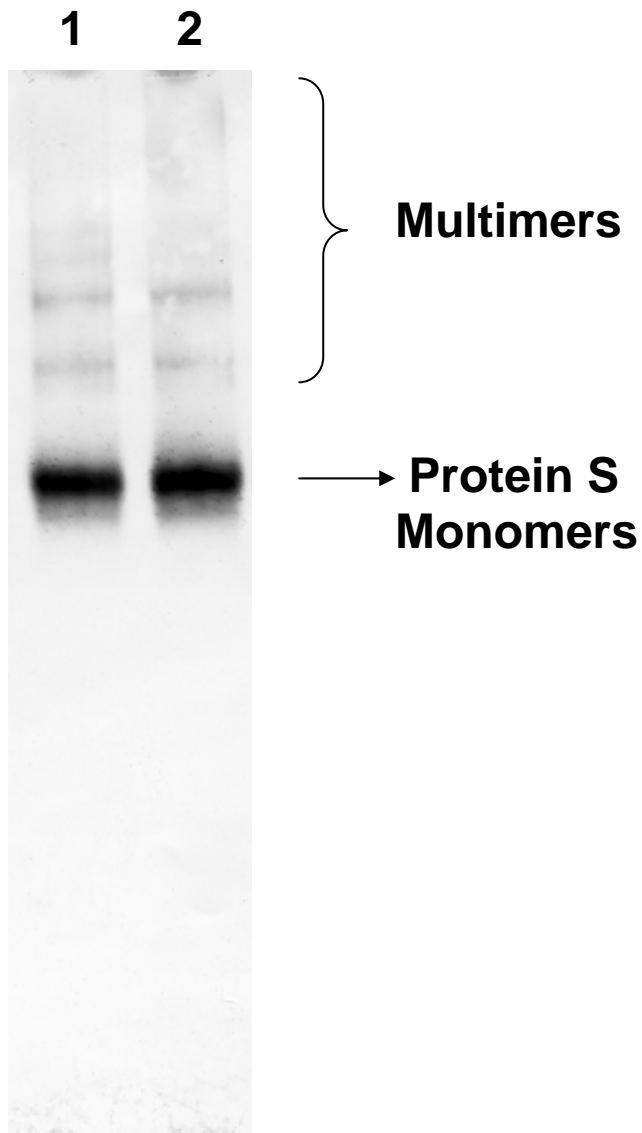

Figure 1S: Protein S (75 ng) was incubated in the absence (Lane 1) or in the presence (Lane 2) of PC/PS vesicles (25  $\mu$ M) prior to analysis by native gel electrophoresis (8-16% Tris Glycine gel, Invitrogen, Carlsbad, CA). Protein bands were then transferred to nitrocellulose membrane using a semi-dry transfer apparatus (24 v for 40 mins) and visualized by using rabbit anti-human protein S primary antibody (Dako) as detailed in the “Experimental Procedures).
